# Supplementary material for: The effect of NAMPT deletion in projection neurons on the function and structure of neuromuscular junction (NMJ) in mice
Source: PubMed Central journal article supplement (PMC6952356; doi:10.1038/s41598-019-57085-4), 2020-01-09
Supplement: 41598_2019_57085_MOESM1_ESM.pdf [file 41598_2019_57085_MOESM1_ESM.pdf]

**The effect of NAMPT deletion in projection neurons on  
the function and structure of neuromuscular junction (NMJ) in mice**

Samuel Lundt<sup>1</sup>, Nannan Zhang<sup>2</sup>, Xiaowan Wang<sup>1</sup>, Luis Polo-Parada<sup>2,3</sup>, Shinghua Ding<sup>1,2\*</sup>

<sup>1</sup>Dept. of Biomedical, Biological and Chemical Engineering

<sup>2</sup>Dalton Cardiovascular Research Center

<sup>3</sup>Dept. of Medical Pharmacology and Physiology

University of Missouri, Columbia, MO 65211

---

\*Corresponding author: Shinghua Ding, Dalton Cardiovascular Research Center, Dept. of Biomedical, Biological and Chemical Engineering, University of Missouri-Columbia, 134 Research Park Drive, Columbia, MO 65211. E-mail: dings@missouri.edu. Tel: 573 884 2489.

Supplementary Figures

**A**

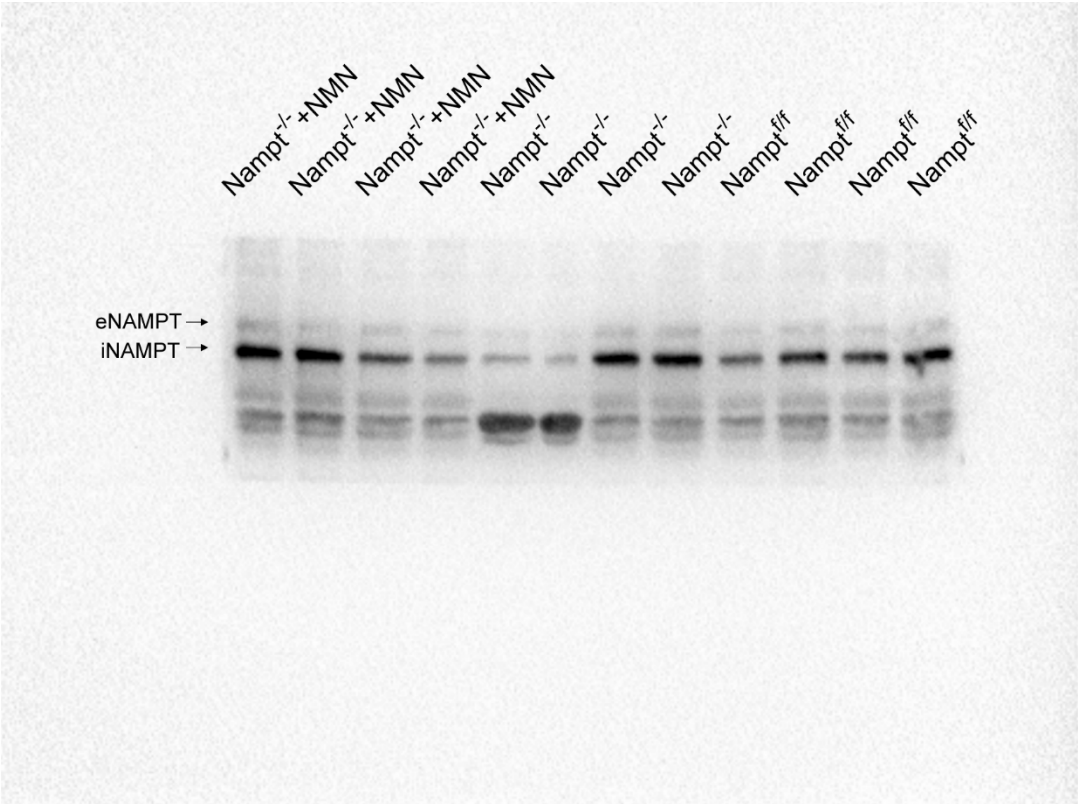

**B**

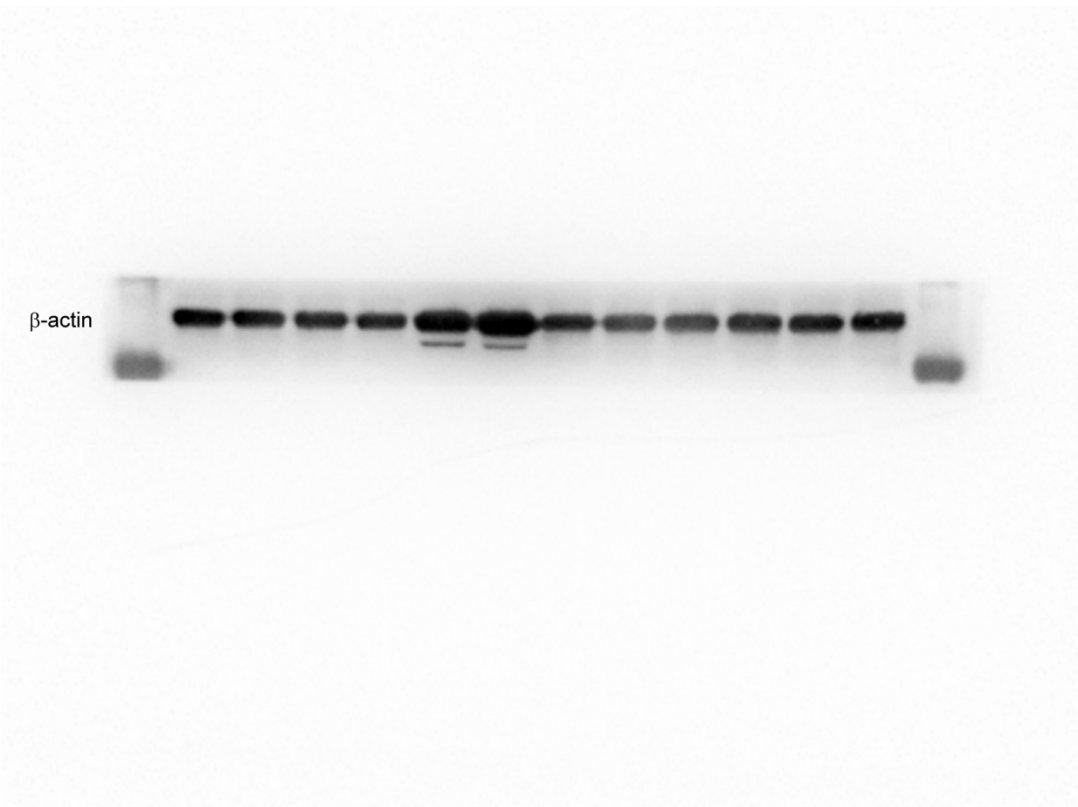

**Supplemental Figure 1. Full Western blotting images of NAMPT levels in semitendinosus muscle from *Nampt<sup>fl/fl</sup>*, *Nampt<sup>-/-</sup>*, and *Nampt<sup>-/-</sup>* +NMN mice.** A) Original image of film incubated with anti-NAMPT antibody (Exposure time=7.9 seconds). B) Original image of film incubated with anti- $\beta$ -actin (Exposure time=1.0 seconds). Images are from different gels that were run with the same sample order at the same time.
